# Supplementary material for: TGFβ signalling is required to maintain pluripotency of human naïve pluripotent stem cells
Source: eLife journal article supplement (doi:10.7554/elife.67259), 2021-08-31

Figure 1 - Source data 1

a

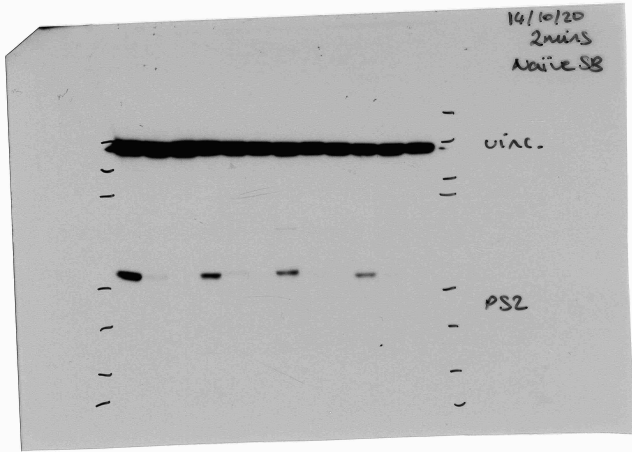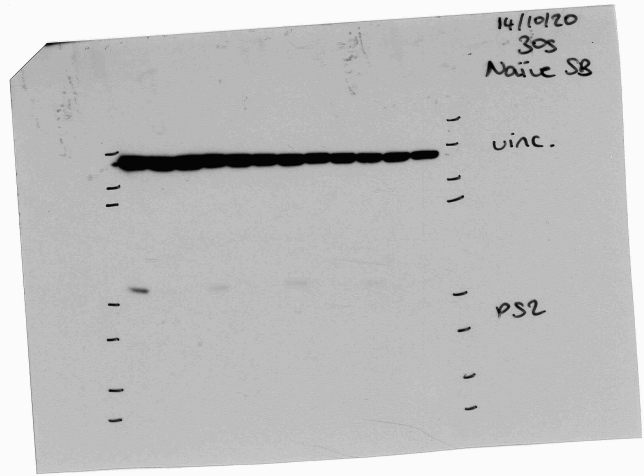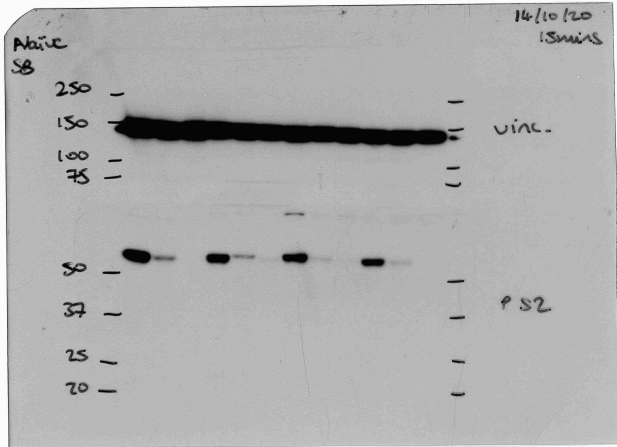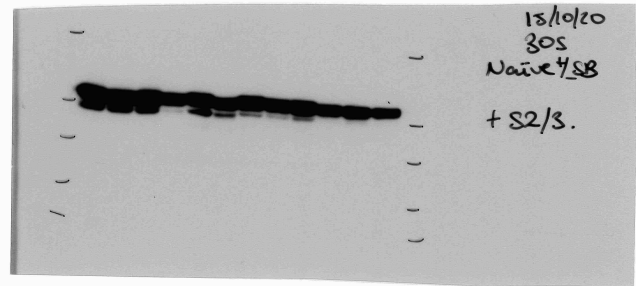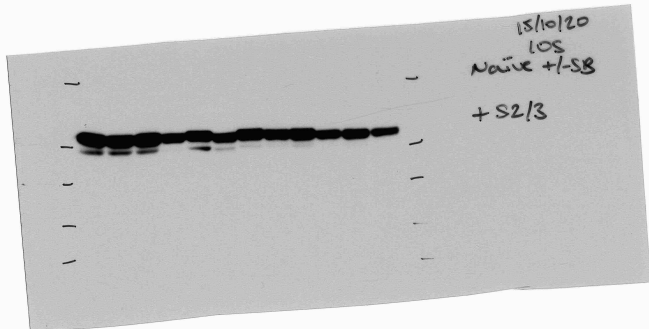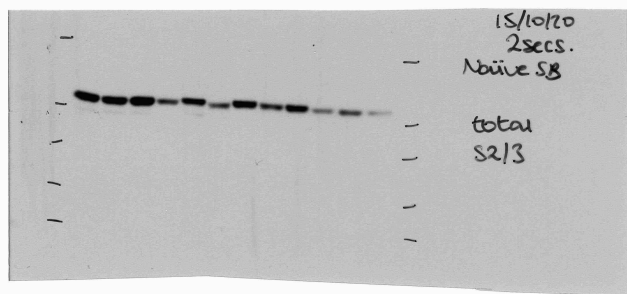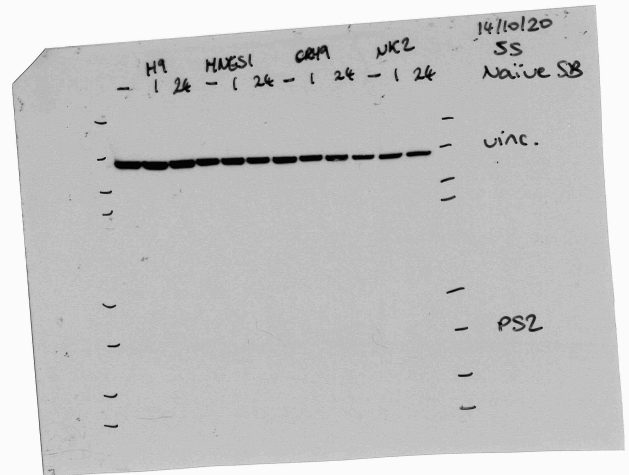

b

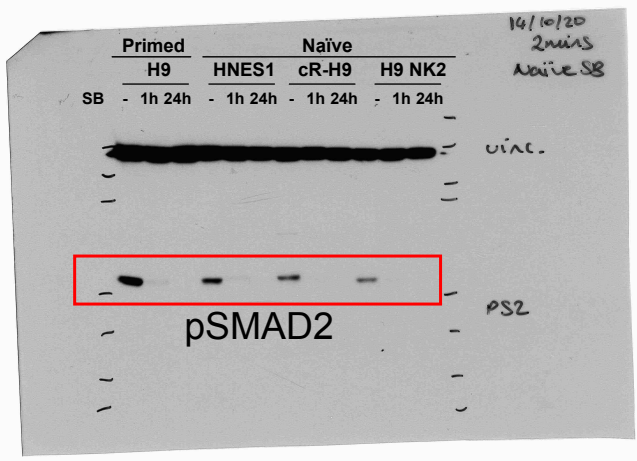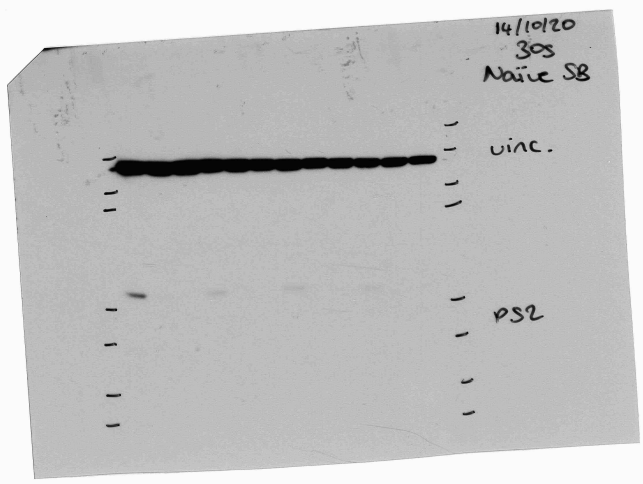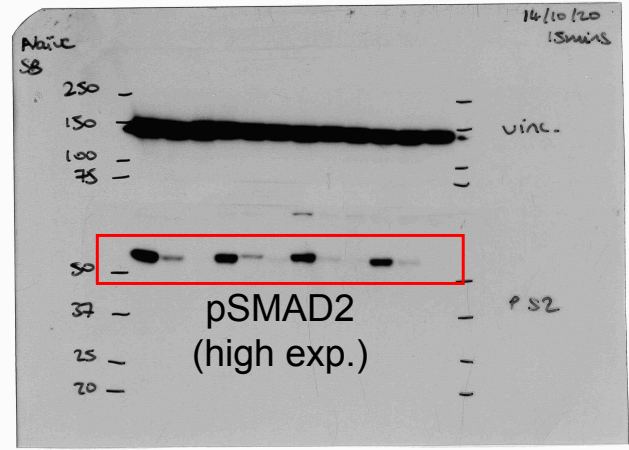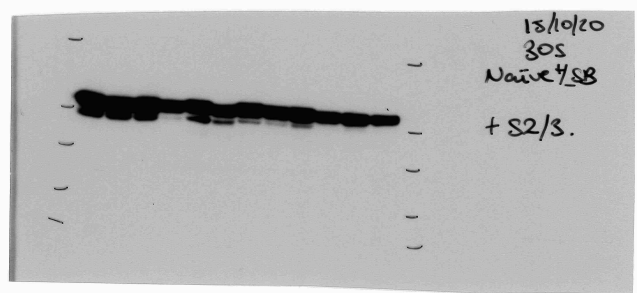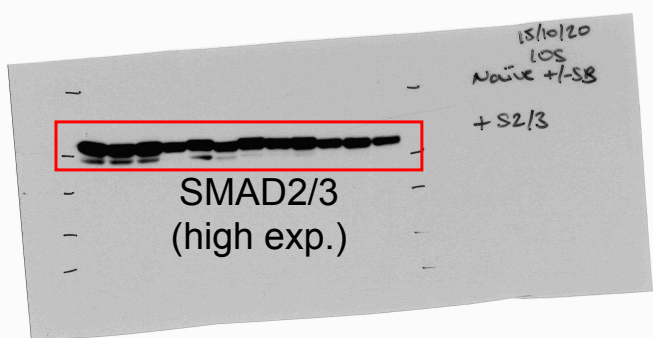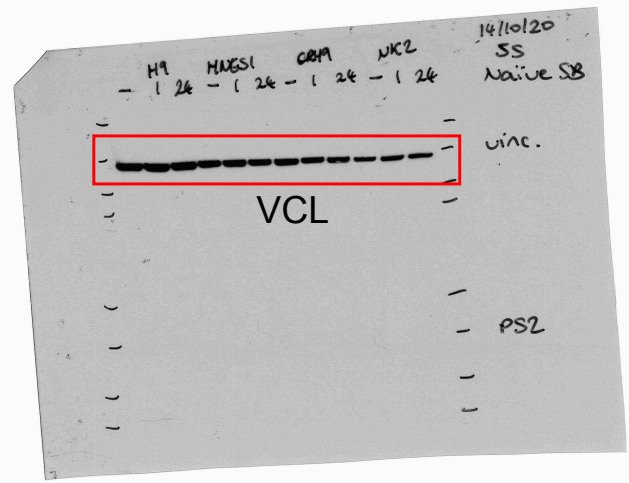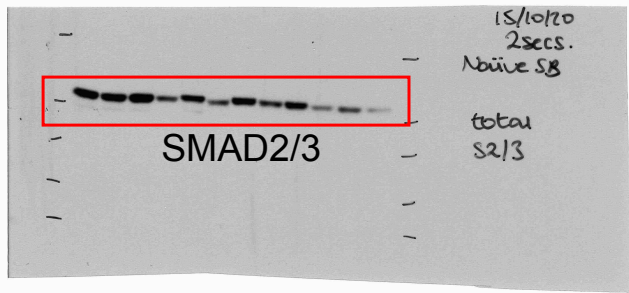

Supplement: fig1-data1 [file elife-67259-fig1-data1-v1.pdf]
