# Supplementary material for: TGFβ signalling is required to maintain pluripotency of human naïve pluripotent stem cells
Source: eLife. 2021 Aug 31;10:e67259. doi: 10.7554/eLife.67259 (PMC8410071; doi:10.7554/eLife.67259)
Supplement: Figure 1—figure supplement 1—source data 1. [file elife-67259-fig1-figsupp1-data1.xlsx]

## Sheet: Fig.1-Fig.Supp.1b
	Naïve			Primed
OCT4	0.740351	0.439298	0.47244	0.628148
NANOG	0.371473	0.231772	0.23697	0.137808
SOX2	0.0174216	0.011243	0.0104152	0.054157
TFCP2L1	0.0325349	0.0173534	0.0184767	0.0011057
KLF5	0.100902	0.0880691	0.0765217	0.00217939
KLF4	0.105054	0.0459313	0.040862	0.00050392
DPPA5	0.563272	0.370405	0.38171	0.000177266
DPPA3	0.315277	0.113413	0.145613	0.00136637
DNM3L	0.285845	0.124677	0.12821	8.31775e-05
SOX17	0.000170593	0.000175277	4.54726e-05	0.000824524
PAX6	5.47026e-05	3.63271e-05	1.42474e-05	0.000234268
T	0.000680703	9.03693e-05	0.000186121	0.000975

## Sheet: Fig.1-Fig.Supp.1f
H9 Primed			HNES1 Naïve			CRH9 Naïve			NK2 Naïve
-	1h SB	24h SB	-	1h SB	24h SB	-	1h SB	24h SB	-	1h SB	24h SB
0.655632	0.0392766	0.00765603	0.378763	0.0296853	0.0198234	0.338845	0.0184026	0.00931061	0.347845	0.0183789	0.00272353
