# Supplementary material for: TGFβ signalling is required to maintain pluripotency of human naïve pluripotent stem cells
Source: eLife. 2021 Aug 31;10:e67259. doi: 10.7554/eLife.67259 (PMC8410071; doi:10.7554/eLife.67259)
Supplement: Figure 3—source data 1. [file elife-67259-fig3-data1.xlsx]

## Sheet: Fig. 3a stats
2way ANOVA Multiple Comparisons
Within each column, compare rows (simple effects within columns)
Number of families	7
Number of comparisons per family	6
Alpha	0.05
Tukey's multiple comparisons test	Mean Diff.	95.00% CI of diff.	Below threshold?	Summary	Adjusted P Value
NANOG
Day 0 vs. SB 2h	0.2852	0.02210 to 0.5483	Yes	*	0.0428
Day 0 vs. SB 24h	0.4765	0.04180 to 0.9112	Yes	*	0.0419
Day 0 vs. SB 72h	0.5992	0.1900 to 1.009	Yes	*	0.0239
SB 2h vs. SB 24h	0.1913	-0.2990 to 0.6817	No	ns	0.265
SB 2h vs. SB 72h	0.3141	-0.06935 to 0.6975	No	ns	0.073
SB 24h vs. SB 72h	0.1227	-0.02720 to 0.2727	No	ns	0.0731
POU5F1
Day 0 vs. SB 2h	0.1106	-0.1790 to 0.4002	No	ns	0.2738
Day 0 vs. SB 24h	0.2814	0.008535 to 0.5542	Yes	*	0.0471
Day 0 vs. SB 72h	0.4277	0.3979 to 0.4574	Yes	****	<0.0001
SB 2h vs. SB 24h	0.1708	-0.2832 to 0.6247	No	ns	0.2802
SB 2h vs. SB 72h	0.317	0.03078 to 0.6033	Yes	*	0.0411
SB 24h vs. SB 72h	0.1463	-0.1560 to 0.4486	No	ns	0.1873
LEFTY B
Day 0 vs. SB 2h	0.6419	-0.4443 to 1.728	No	ns	0.1326
Day 0 vs. SB 24h	0.9805	0.9278 to 1.033	Yes	****	<0.0001
Day 0 vs. SB 72h	0.9919	0.9729 to 1.011	Yes	****	<0.0001
SB 2h vs. SB 24h	0.3386	-0.7270 to 1.404	No	ns	0.3575
SB 2h vs. SB 72h	0.35	-0.7369 to 1.437	No	ns	0.351
SB 24h vs. SB 72h	0.01138	-0.02522 to 0.04798	No	ns	0.3682
LEFTY A
Day 0 vs. SB 2h	0.6485	-0.4241 to 1.721	No	ns	0.1273
Day 0 vs. SB 24h	0.9786	0.9236 to 1.034	Yes	****	<0.0001
Day 0 vs. SB 72h	0.991	0.9665 to 1.016	Yes	****	<0.0001
SB 2h vs. SB 24h	0.3301	-0.7444 to 1.405	No	ns	0.3743
SB 2h vs. SB 72h	0.3425	-0.7229 to 1.408	No	ns	0.3518
SB 24h vs. SB 72h	0.01242	-0.02019 to 0.04503	No	ns	0.2749
SMAD7
Day 0 vs. SB 2h	0.331	0.1158 to 0.5463	Yes	*	0.0217
Day 0 vs. SB 24h	0.5489	0.1778 to 0.9199	Yes	*	0.0234
Day 0 vs. SB 72h	0.6631	0.5204 to 0.8057	Yes	**	0.0012
SB 2h vs. SB 24h	0.2178	-0.1485 to 0.5842	No	ns	0.1311
SB 2h vs. SB 72h	0.332	-0.009182 to 0.6732	No	ns	0.0527
SB 24h vs. SB 72h	0.1142	-0.2405 to 0.4689	No	ns	0.3511
DPPA3
Day 0 vs. SB 2h	0.1798	-0.04675 to 0.4063	No	ns	0.0774
Day 0 vs. SB 24h	0.5042	0.2691 to 0.7394	Yes	*	0.0114
Day 0 vs. SB 72h	0.4709	0.4097 to 0.5321	Yes	****	<0.0001
SB 2h vs. SB 24h	0.3245	-0.09929 to 0.7482	No	ns	0.0828
SB 2h vs. SB 72h	0.2911	0.02180 to 0.5605	Yes	*	0.0431
SB 24h vs. SB 72h	-0.03331	-0.2075 to 0.1408	No	ns	0.6305
DPPA5
Day 0 vs. SB 2h	0.0315	-0.3570 to 0.4200	No	ns	0.9353
Day 0 vs. SB 24h	0.2364	-0.001625 to 0.4745	No	ns	0.0507
Day 0 vs. SB 72h	0.4183	0.005284 to 0.8314	Yes	*	0.0488
SB 2h vs. SB 24h	0.2049	-0.3276 to 0.7374	No	ns	0.2707
SB 2h vs. SB 72h	0.3868	-0.2224 to 0.9961	No	ns	0.1166
SB 24h vs. SB 72h	0.1819	-0.01210 to 0.3759	No	ns	0.0565
Test details	Mean 1	Mean 2	Mean Diff.	SE of diff.	N1	N2	q	DF
NANOG
Day 0 vs. SB 2h	1	0.7148	0.2852	0.03797	3	3	10.62	2
Day 0 vs. SB 24h	1	0.5235	0.4765	0.06274	3	3	10.74	2
Day 0 vs. SB 72h	1	0.4008	0.5992	0.05907	3	3	14.35	2
SB 2h vs. SB 24h	0.7148	0.5235	0.1913	0.07077	3	3	3.823	2
SB 2h vs. SB 72h	0.7148	0.4008	0.3141	0.05533	3	3	8.027	2
SB 24h vs. SB 72h	0.5235	0.4008	0.1227	0.02164	3	3	8.022	2
POU5F1
Day 0 vs. SB 2h	1	0.8894	0.1106	0.0418	3	3	3.743	2
Day 0 vs. SB 24h	1	0.7186	0.2814	0.03938	3	3	10.11	2
Day 0 vs. SB 72h	1	0.5723	0.4277	0.004291	3	3	140.9	2
SB 2h vs. SB 24h	0.8894	0.7186	0.1708	0.06552	3	3	3.686	2
SB 2h vs. SB 72h	0.8894	0.5723	0.317	0.04131	3	3	10.85	2
SB 24h vs. SB 72h	0.7186	0.5723	0.1463	0.04363	3	3	4.741	2
LEFTY 2
Day 0 vs. SB 2h	1	0.3581	0.6419	0.1568	3	3	5.791	2
Day 0 vs. SB 24h	1	0.01947	0.9805	0.007614	3	3	182.1	2
Day 0 vs. SB 72h	1	0.00809	0.9919	0.002746	3	3	510.9	2
SB 2h vs. SB 24h	0.3581	0.01947	0.3386	0.1538	3	3	3.114	2
SB 2h vs. SB 72h	0.3581	0.00809	0.35	0.1569	3	3	3.155	2
SB 24h vs. SB 72h	0.01947	0.00809	0.01138	0.005282	3	3	3.047	2
LEFTY 1
Day 0 vs. SB 2h	1	0.3515	0.6485	0.1548	3	3	5.925	2
Day 0 vs. SB 24h	1	0.0214	0.9786	0.007943	3	3	174.2	2
Day 0 vs. SB 72h	1	0.008977	0.991	0.003545	3	3	395.3	2
SB 2h vs. SB 24h	0.3515	0.0214	0.3301	0.1551	3	3	3.01	2
SB 2h vs. SB 72h	0.3515	0.008977	0.3425	0.1538	3	3	3.15	2
SB 24h vs. SB 72h	0.0214	0.008977	0.01242	0.004706	3	3	3.732	2
SMAD7
Day 0 vs. SB 2h	1	0.669	0.331	0.03106	3	3	15.07	2
Day 0 vs. SB 24h	1	0.4511	0.5489	0.05355	3	3	14.5	2
Day 0 vs. SB 72h	1	0.3369	0.6631	0.02059	3	3	45.55	2
SB 2h vs. SB 24h	0.669	0.4511	0.2178	0.05287	3	3	5.828	2
SB 2h vs. SB 72h	0.669	0.3369	0.332	0.04924	3	3	9.535	2
SB 24h vs. SB 72h	0.4511	0.3369	0.1142	0.05119	3	3	3.154	2
DPPA3
Day 0 vs. SB 2h	1	0.8202	0.1798	0.03269	3	3	7.776	2
Day 0 vs. SB 24h	1	0.4958	0.5042	0.03394	3	3	21.01	2
Day 0 vs. SB 72h	1	0.5291	0.4709	0.008836	3	3	75.37	2
SB 2h vs. SB 24h	0.8202	0.4958	0.3245	0.06116	3	3	7.503	2
SB 2h vs. SB 72h	0.8202	0.5291	0.2911	0.03887	3	3	10.59	2
SB 24h vs. SB 72h	0.4958	0.5291	-0.03331	0.02513	3	3	1.875	2
DPPA5
Day 0 vs. SB 2h	1	0.9685	0.0315	0.05607	3	3	0.7945	2
Day 0 vs. SB 24h	1	0.7636	0.2364	0.03435	3	3	9.732	2
Day 0 vs. SB 72h	1	0.5817	0.4183	0.05961	3	3	9.924	2
SB 2h vs. SB 24h	0.9685	0.7636	0.2049	0.07685	3	3	3.771	2
SB 2h vs. SB 72h	0.9685	0.5817	0.3868	0.08793	3	3	6.222	2
SB 24h vs. SB 72h	0.7636	0.5817	0.1819	0.028	3	3	9.188	2

## Sheet: Fig. 3a data
	NANOG			POU5F1			LEFTY 2			LEFTY 1			SMAD7			DPPA3			DPPA5
Day 0	1	1	1	1	1	1	1	1	1	1	1	1	1	1	1	1	1	1	1	1	1
SB 2h	0.70072	0.786482	0.657237	0.805796	0.932027	0.930338	0.0735754	0.386263	0.614427	0.0789166	0.360589	0.614926	0.665669	0.616886	0.724344	0.75908	0.830799	0.870839	0.85687	1.03367	1.01495
SB 24h	0.644617	0.491326	0.434553	0.74155	0.641909	0.772407	0.0196114	0.00620959	0.0325848	0.029061	0.00551389	0.0296139	0.550957	0.367634	0.434758	0.556756	0.439465	0.491144	0.797697	0.798179	0.694875
SB 72h	0.497147	0.411706	0.293401	0.571042	0.580349	0.565657	0.0105336	0.0026089	0.0111271	0.0102914	0.00228548	0.0143544	0.362802	0.351738	0.296259	0.544374	0.513767	0.529169	0.611349	0.666815	0.466814

## Sheet: Fig. 3c stats
2way ANOVA Multiple Comparisons
Compare each cell mean with the other cell mean in that column
Number of families	1
Number of comparisons per family	6
Alpha	0.05
Šídák's multiple comparisons test	Mean Diff.	95.00% CI of diff.	Below threshold?	Summary	Adjusted P Value
iKD -TET - iKD +TET
NANOG	0.4493	0.2356 to 0.6630	Yes	****	<0.0001
OCT4	0.2455	0.03175 to 0.4592	Yes	*	0.0183
LEFTY 2	0.7531	0.5393 to 0.9668	Yes	****	<0.0001
NODAL	0.448	0.2342 to 0.6617	Yes	****	<0.0001
SMAD2	0.6316	0.4178 to 0.8453	Yes	****	<0.0001
SMAD3	0.5729	0.3592 to 0.7866	Yes	****	<0.0001
Test details	Mean 1	Mean 2	Mean Diff.	SE of diff.	N1	N2	t	DF
iKD -TET - iKD +TET
NANOG	1	0.5507	0.4493	0.07457	3	3	6.025	24
OCT4	1	0.7545	0.2455	0.07457	3	3	3.292	24
LEFTY A	1	0.2469	0.7531	0.07457	3	3	10.1	24
NODAL	1	0.552	0.448	0.07457	3	3	6.007	24
SMAD2	1	0.3684	0.6316	0.07457	3	3	8.469	24
SMAD3	1	0.4271	0.5729	0.07457	3	3	7.683	24

## Sheet: Fig. 3c data
	NANOG			OCT4			LEFTY A			NODAL			SMAD2			SMAD3
iKD -TET	0.94275	0.949903	1.10735	0.891202	0.987575	1.12122	1.14099	0.958896	0.900118	0.919596	1.00107	1.07934	0.901571	0.987264	1.11116	0.851958	0.917181	1.23086
iKD +TET	0.519618	0.579826	0.552598	0.784996	0.756477	0.722108	0.251632	0.229115	0.260094	0.553155	0.571167	0.531775	0.34987	0.372085	0.383352	0.460374	0.398498	0.422404

## Sheet: Fig. 3e stats
2way ANOVA Multiple Comparisons
Compare each cell mean with the other cell mean in that row
Number of families	1
Number of comparisons per family	6
Alpha	0.05
Šídák's multiple comparisons test	Mean Diff.	95.00% CI of diff.	Below threshold?	Summary	Adjusted P Value
Naïve - SB 14d
OCT4	0.8677	-21.46 to 23.19	No	ns	>0.9999
NANOG	0.9502	-21.38 to 23.28	No	ns	>0.9999
HAND1	-13.61	-35.94 to 8.716	No	ns	0.3922
TP63	-44.15	-66.48 to -21.83	Yes	***	0.0003
MMP2	-25.2	-47.53 to -2.877	Yes	*	0.0239
SDC1	-93.8	-116.1 to -71.47	Yes	****	<0.0001
Test details	Mean 1	Mean 2	Mean Diff.	SE of diff.	N1	N2	t	DF
Naïve - SB 14d
OCT4	1	0.1323	0.8677	7.107	2	2	0.1221	12
NANOG	1	0.04978	0.9502	7.107	2	2	0.1337	12
HAND1	1	14.61	-13.61	7.107	2	2	1.915	12
TP63	1	45.15	-44.15	7.107	2	2	6.212	12
MMP2	1	26.2	-25.2	7.107	2	2	3.546	12
SDC1	1	94.8	-93.8	7.107	2	2	13.2	12

## Sheet: Fig. 3e data
	Naïve		SB 14d
OCT4	0.845946	1.15405	0.108327	0.156178
NANOG	0.933928	1.06607	0.0478216	0.0517299
HAND1	0.922106	1.07789	14.2469	14.9724
TP63	0.735689	1.26431	42.2458	48.0567
MMP2	0.70329	1.29671	22.5529	29.8519
SDC1	1.09138	0.908617	111.563	78.0372

## Sheet: Fig. 3i data
	CK7			ITGA6			TP63			SDC-1			HLA-G
Naive	0.00019131	0.00029244	0.0002725	0.013218	0.013869	0.015047	0.000111	8.98e-05	8.02e-05	0.000165	0.000138	0.000181	9.26e-05	7.35e-05	6.44e-05
TS NK2 H9 P1	0.05637	0.060959	0.062708	0.078889	0.090157	0.086011	0.006751	0.007869	0.008835	0.013709	0.016314	0.015254	0.001569	0.001495	0.001808
TS NK2 H9 P3	0.08719	0.076722	0.074276	0.114099	0.099269	0.100521	0.012169	0.010973	0.011255	0.037456	0.032004	0.031995	0.004065	0.004364	0.004374
STB cells	0.150451	0.130038	0.121457	0.003736	0.005017	0.003302	0.000174	0.000132	0.000139	0.244124	0.197625	0.187195	0.002504	0.00138	0.001105
EVT cells	0.045259	0.0562	0.046811	0.032598	0.049599	0.046146	0.000935	0.00155	0.001747	0.027911	0.033979	0.036835	0.050828	0.063418	0.066007
